# Supplementary material for: A camelid single-domain antibody neutralizes botulinum neurotoxin A by blocking host receptor binding
Source: PubMed Central journal article supplement (PMC5547058; doi:10.1038/s41598-017-07457-5), 2017-08-07
Supplement: 41598_2017_7457_MOESM1_ESM.pdf [file 41598_2017_7457_MOESM1_ESM.pdf]

## Supplementary Information

### **A camelid single-domain antibody neutralizes botulinum neurotoxin A by blocking host receptor binding**

Guorui Yao<sup>1</sup>, Kwok-ho Lam<sup>1</sup>, Jasmin Weisemann<sup>2</sup>, Lisheng Peng<sup>3</sup>, Nadja Krez<sup>2</sup>, Kay Perry<sup>4</sup>, Charles B. Shoemaker<sup>5</sup>, Min Dong<sup>3</sup>, Andreas Rummel<sup>2</sup>, Rongsheng Jin<sup>1\*</sup>

<sup>1</sup> Department of Physiology and Biophysics, University of California, Irvine, California, USA.

<sup>2</sup> Institut für Toxikologie, Medizinische Hochschule Hannover, Hannover, Germany.

<sup>3</sup> Department of Urology, Boston Children's Hospital, Department of Microbiology and Immunobiology and Department of Surgery, Harvard Medical School, Boston, Massachusetts, USA.

<sup>4</sup> NE-CAT and Department of Chemistry and Chemical Biology, Cornell University, Argonne National Laboratory, Argonne, Illinois USA.

<sup>5</sup> Department of Infectious Diseases and Global Health, Tufts Clinical and Translational Science Institute, North Grafton, Massachusetts, USA

\*Correspondence to: R.J. (r.jin@uci.edu),

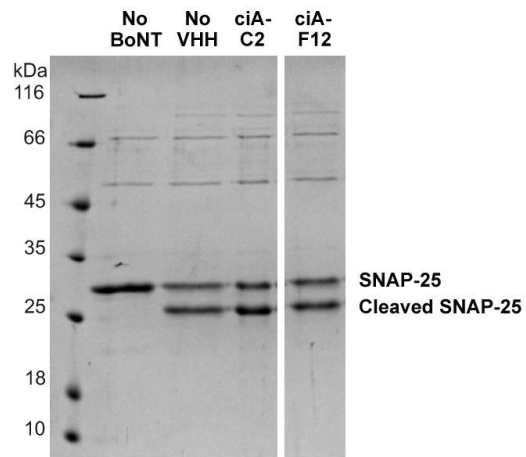

**Supplementary Figure 1. VHH ciA-C2 and ciA-F12 do not affect the enzymatic activity of BoNT/A1.** *In vitro* SNAP-25 endopeptidase assay where BoNT/A1 (10 nM) was pre-incubated for 15 min at 37 °C with ciA-C2 or ciA-F12 (30 nM), respectively. The BoNT/A1-VHH mixture was then added to recombinant SNAP-25 (3 μM) for 60 min at 37 °C. The lower band shows BoNT/A1-cleaved SNAP-25.

|      |      |      |       |      |       |        |       |
|------|------|------|-------|------|-------|--------|-------|
|      |      | 1064 |       | 1112 |       | 1146   |       |
| HcA1 | GCRD | THR  | YIWI  | ...  | QYDKP | YYMLNL | ...   |
| HcA2 | GCRD | PRR  | YIMI  | ...  | QYDKP | YYMLNL | ...   |
| HcA3 | GCRD | PRR  | YIMI  | ...  | QYDKP | YYMLNL | ...   |
| HcA4 | GCRD | PHR  | YIVI  | ...  | QYDKS | YYMLNL | ...   |
| HcA5 | GCRD | PQR  | YIWI  | ...  | QYDKP | YYMLNL | ...   |
| HcA6 | GCRD | PRR  | YIMI  | ...  | QYDKP | YYMLNL | ...   |
| HcA7 | GCRD | PHR  | YILI  | ...  | QYDKP | YYMLNL | ...   |
| HcA8 | GCRD | PRR  | YIVI  | ...  | QYDKP | YYMLNL | ...   |
| HcHA | GCRD | PHR  | YIWI  | ...  | QYDKP | YYMLNL | ...   |
|      | **** | :    | *** * |      | ****  | *      | ***** |

  

|      |      |      |       |      |       |      |       |
|------|------|------|-------|------|-------|------|-------|
|      |      | 1159 |       | 1188 |       | 1289 | 1295  |
| HcA1 | YRGT | KFI  | IKKY  | ...  | NVVVK | NKEY | RL    |
| HcA2 | YEGT | KFI  | IKKY  | ...  | NVVVK | NKEY | RL    |
| HcA3 | YMG  | KFI  | IKKY  | ...  | NVVVK | NKEY | RL    |
| HcA4 | YMG  | KFI  | IKKY  | ...  | NVVVK | NKEY | RL    |
| HcA5 | YMG  | KFI  | IKKY  | ...  | NVVVK | NKEY | RL    |
| HcA6 | YMG  | KFI  | IKKY  | ...  | NVVVN | NKEY | RL    |
| HcA7 | YMG  | KFI  | IKKH  | ...  | NVLVK | NKEY | RL    |
| HcA8 | YMG  | KFI  | IKKY  | ...  | NVVVK | NKEY | RL    |
| HcHA | YMG  | KFI  | IKKY  | ...  | NVVVK | NKEY | RL    |
|      | *    | **   | ***** | :    | **    | :    | ***** |

**Supplementary Figure 2: The ciA-C2-interacting residues (indicated by black boxes) are largely conserved among BoNT/A1-A8 and BoNT/HA.** The amino acid sequences are taken from GenBank: AAQ06331.1 (A1), ACO83782.1 (A2), ABA29017.1 (A3), ACQ51417.1 (A4), ACG50065.1 (A5), ACW83608.1 (A6), AFV13854.1 (A7), AJA05787.1 (A8), and KGO15617.1 (HA). The numbering is based on the sequence of BoNT/A1. Sequence alignment was made using Clustal Omega <sup>1</sup>.

**Supplementary Table 1: Hydrogen bonds between ciA-C2 and HcA1**

| <b>Residues (ciA-C2, Chain B)</b> | <b>Distance (Å)</b> | <b>Residues (HcA1, Chain A)</b> |
|-----------------------------------|---------------------|---------------------------------|
| Gly 26 [O]                        | 2.71                | Asn1188 [ND2]                   |
| Gly 28 [N]                        | 2.97                | Asn 1188 [OD1]                  |
| Trp 30 [NE1]                      | 3.05                | Asn 1188 [OD1]                  |
| Trp 30 [NE1]                      | 3.37                | Asn 1188 [O]                    |
| Thr 37 [OG1]                      | 2.69                | Asp 1289 [OD1]                  |
| Glu 50 [OE1]                      | 2.99                | Thr 1146 [N]                    |
| Glu 50 [OE1]                      | 2.74                | Thr 1146 [OG1]                  |
| Leu 54 [O]                        | 2.80                | His 1064 [NE2]                  |
| Thr 65 [OG1]                      | 2.75                | His 1064 [ND1]                  |
| Tyr 66 [O]                        | 2.70                | Thr 1063 [OG1]                  |
| Glu 106 [OE2]                     | 2.53                | Tyr 1112 [OH]                   |
| Trp 108 [NE1]                     | 3.13                | Glu 1293 [O]                    |

**Reference**

- 1 Sievers, F. *et al.* Fast, scalable generation of high-quality protein multiple sequence alignments using Clustal Omega. *Mol Syst Biol* **7**, 539, doi:10.1038/msb.2011.75 (2011).
